# Supplementary material for: Efficacy and indications of tonsillectomy in patients with IgA nephropathy: a retrospective study
Source: PeerJ. 2022 Dec 5;10:e14481. doi: 10.7717/peerj.14481 (PMC9745907; doi:10.7717/peerj.14481)
Supplement: Supplemental Information 6 [file peerj-10-14481-s006.xlsx]

## Sheet: Sheet1
ID	group（0 is nontonsillectomy group，1 is tonsillectomy group）	sex（0 is male，1 is female）	age	sCr	sIgA	hematuria	hematuria（0 is no hematuria，1 is hematuria）	proteinuria (g/24h)	systolic blood pressure	diastolic blood pressure	MAP	M	E	S	T	C	steroid/immunosuppressant（0 is no，1 is yes）	ACEI and ARB（0 is no，1 is yes）	hematuria remission （0 is no，1 is yes）	hematuria remission time	proteinuria remission （0 is no，1 is yes）	proteinuria remission time	complete remission （0 is no，1 is yes）	complete remission time	reach the endpoints（0 is no，1 is yes）	time to reach the endpoints
306087	0	1	2.6	6.66	2.57	2	1	5.13	129	95	10.63	0	0	1	0	0	1	0	0	13	0	13	0	13	0	13
351153	0	0	2.6	26.41	3.29	2	1	1.5	151	90	11.03	0	1	1	0	1	1	0	0	44.6	0	44.6	0	44.6	1	44.6
812147	0	1	3.3	15.28	3.31	1	1	3.5	148	107	12.07	0	0	1	0	0	0	0	1	6.1	0	30.5	0	31.7	1	30.5
847274	1	1	3.4	9.23	2.55	2	1	1.38	120	70	8.67	1	0	1	0	0	1	1	1	17	0	105.8	0	105.8	0	105.8
850083	1	1	2	5.08	2.23	3	1	0.23	119	76	9.03	0	0	0	0	0	1	1	0	65.7	1	51.8	0	65.7	0	65.7
867314	1	1	3.3	7.76		2	1	0.73	125	68	8.7	0	0	1	0	0	1	1	1	16	1	30.1	1	45.3	0	96.3
870228	1	1	2.8	5.97	2.42	2	1	0.02	135	94	10.77	1	0	0	0	0	0	0	1	5.2	1	0	1	5.2	0	84.8
874921	0	1	3.1	9.98	2.11	2	1	0.16	123	67	8.57	1	0	1	1	0	1	1	0	35.8	0	35.8	0	35.8	0	35.8
875101	1	1	2.4	6.87	2.07	2	1	0.19	122	71	8.8	0	0	1	0	0	1	1	1	5.9	1	17	1	21.6	0	98.9
877544	1	1	4.7	13.57	2.79	0.5	0	0.43	139	87	10.43	1	0	1	1	0	1	1	1	5.7	1	1.6	1	5.7	0	98.9
879607	0	1	4.4	11.84	4.76	3	1	2.09	125	86	9.9	1	0	1	1	1	1	1	0	100	1	25.7	0	100	0	100
880281	0	0	2.8	8.47	1.91	1	1	0.36	113	79	9.03	0	0	0	0	0	0	1	1	1.1	0	26.8	0	26.8	0	26.8
880990	1	1	3.7	8.39	1.61	2	1	0.68	124	92	10.27	1	0	1	1	0	1	1	1	7.2	1	14.4	1	20.5	0	97.9
883582	0	1	2.1	5.2	3.74	2	1	0.4	120	90	10	1	0	1	0	1	0	1	0	83.1	1	0.5	0	83.1	0	83.1
885538	0	1	3	5.53		3	1	0.26	118	75	8.93	1	0	1	1	1	0	1	0	16.7	0	16.7	0	16.7	0	16.7
887860	1	1	2.2	11.53	2.25	3	1	0.52	136	90	10.53	0	0	1	0	0	1	1	1	6.8	1	1.3	1	6.8	0	63
889306	0	1	2.4	7.3	1.18	0	0	4.8	156	103	12.07	0	0	1	0	0	1	1	1	0	1	1.1	1	1.1	0	12.6
889744	0	1	2.9	4.64	2.96	0.5	0	0.95	160	105	12.33	1	0	1	0	0	0	1	1	30.3	0	92.4	0	92.4	0	92.4
891158	0	0	2	12.13	1.31	2	1	1.58	134	84	10.07	0	0	1	2	0	1	1	0	81.5	1	9	0	85.4	1	81.5
896092	0	1	1.7	20.52	2.31	2	1	6.94	130	90	10.33	0	0	1	0	1	1	1	0	19.3	0	19.3	0	19.3	1	19.3
898098	0	1	2	5.53	3.36	3	1	0.17	125	82	9.63	0	0	1	0	0	0	0	0	15.5	0	15.5	0	15.5	0	15.5
898482	1	1	3.1	7.53	3.57	1	1	2.11	135	81	9.9	1	0	1	0	0	1	1	1	4.6	1	10.7	1	17	0	74
900791	0	0	2.8	10.12	2.2	0.5	0	2.51	97	78	8.43	0	0	0	0	0	1	1	1	13.3	0	35.2	0	35.2	0	35.2
900817	0	1	2	7.92	1.92	0.5	0	1.54	148	83	10.47	0	0	1	0	0	0	0	1	0.7	1	0.7	1	0.7	0	94.4
901197	0	1	4.2	8.23	2.22	0.5	0	0.09	120	82	9.47	0	0	0	0	0	1	0	1	7	0	27.8	0	27.8	0	27.8
902991	0	1	4.6	6.39	3.22	3	1	0.65	120	80	9.33	1	0	0	0	0	1	0	0	92.5	1	3.9	0	92.5	0	92.5
903105	0	1	4.4	9.79		0.5	0	0.22	116	82	9.33	0	0	1	0	0	0	0	1	10.9	1	10.9	1	10.9	0	40.1
903948	1	1	3.8	11.21	1.14	2	1	0.54	127	89	10.17	1	0	1	1	0	1	1	0	30.2	0	30.2	0	30.2	0	30.2
904410	1	0	2.9	10.57		1	1	0.44	167	70	10.23	1	0	1	1	0	0	1	1	2.7	0	89.2	0	89.2	0	89.2
908317	0	0	2.5	6.4		0	0	0.09	117	60	7.9	0	0	0	0	0	1	0	1	72.9	1	72.9	1	72.9	0	84.2
910374	0	1	3.7	5.56		1	1	0.14	128	74	9.2	0	0	0	0	0	0	1	0	35.5	1	0	0	35.5	0	35.5
916763	0	1	4.4	5.72	1.6	2	1	0.2	125	88	10.03	1	0	0	0	0	1	0	1	10.3	1	1.3	1	10.3	0	88.7
917617	0	1	4.9	7.32	1.43	2	1	0.27	118	92	10.07	0	0	1	0	0	0	1	1	12.2	1	1.4	1	12.2	0	86.7
917888	0	1	3.3	6.05	1.93	3	1	0.62	131	102	11.17	1	0	1	0	0	0	1	0	49.4	0	49.4	0	49.4	0	49.4
918025	1	0	2.3	9.8	3.39	2	1	2.24	120	89	9.93	1	0	1	0	1	1	1	0	79.6	0	79.6	0	79.6	0	79.6
918934	1	0	4.2	13.31	2.78	2	1	0.69	146	93	11.07	1	0	1	1	0	1	1	1	10.9	1	22.5	1	22.5	0	91.1
920129	0	1	2.6	5.99		3	1	0.5	104	72	8.27	1	0	0	0	0	0	0	0	84.5	1	4.8	0	84.5	0	84.5
921378	0	0	2.4	7.96	1.21	0.5	0	0.45	117	77	9.03	1	0	1	0	0	0	1	1	3.4	1	3.4	1	3.4	0	81.8
921769	0	1	4.2	17.5	1.47	2	1	2.9	135	99	11.1	1	0	1	1	0	1	1	1	9.7	0	37.3	0	37.3	0	37.3
921929	1	1	3.8	5.26	1.8	2	1	1.13	123	69	8.7	0	0	1	0	0	1	0	0	27.4	1	3.1	0	27.4	0	27.4
922035	1	0	2.3	7.48	2.03	3	1	1.17	110	70	8.33	1	0	1	0	0	1	1	0	25.5	1	2.3	0	25.5	0	25.5
923477	0	0	1.7	10.04		3	1	0.23	137	79	9.83	1	0	0	0	0	1	1	1	46.2	1	26.2	1	46.2	0	90.9
924463	0	0	3.6	8.39	3.49	2	1	0.5	100	74	8.27	1	0	0	0	0	0	1	0	73.3	0	73.3	0	73.3	0	73.3
924971	1	1	3.8	4.94	1.68	0.5	0	0.37	117	73	8.77	1	0	1	0	0	0	0	0	73.2	1	0.7	0	73.2	0	73.2
925377	0	0	4.2	6.06	1.45	3	1	4.26	161	124	13.63	1	0	1	0	1	1	0	1	45.5	0	86.3	0	86.3	0	86.3
926023	1	1	2.3	6.84	3.55	2	1	0.57	125	83	9.7	0	0	1	1	0	0	0	1	29.4	0	86.2	0	86.2	0	86.2
927173	1	0	1.8	11.45	0.97	1	1	0.36	126	73	9.07	1	0	1	1	0	1	1	0	88.7	0	88.7	0	88.7	0	88.7
928520	0	1	4.7	5.7	2.35	2	1	0.12	120	75	9	0	0	0	0	0	1	0	0	20.3	0	20.3	0	20.3	0	20.3
928739	0	1	4	5.26	2.08	2	1	0.04	123	79	9.37	1	0	0	0	0	0	1	0	69.9	1	0	0	69.9	0	69.9
928912	1	0	2.5	8.84	2.17	3	1	3.25	111	56	7.43	1	0	0	0	1	0	1	1	12.9	1	4.5	1	12.9	0	84.2
929308	0	0	2.5	6.62	1.08	2	1	0.09	125	77	9.3	1	0	0	1	0	1	1	0	60.2	0	60.2	0	60.2	0	60.2
930731	0	1	4.3	6.62	2.99	0	0	0.24	127	70	8.9	1	0	1	0	0	0	0	1	37	1	12.4	1	37	0	64.1
931566	1	0	4	6.83		2	1	0.45	116	80	9.2	1	0	1	1	0	1	1	1	3.5	0	47.5	0	47.5	0	47.5
931723	0	1	2.3	9.13	2.88	2	1	0.3	101	63	7.57	0	0	1	1	0	0	1	1	0.5	1	8.8	1	8.8	0	86.9
932756	0	1	2.6	5.7	2.02	0.5	0	0.12	112	67	8.2	1	0	1	0	0	1	0	0	57.3	1	0	0	57.3	0	57.3
932896	0	0	2.3	10.87	1.52	3	1	1.04	185	126	14.57	1	0	1	1	0	1	1	0	88.1	0	88.1	0	88.1	0	88.1
933120	1	1	2.3	3.79	2.66	3	1	1.69	111	71	8.43	1	0	1	0	0	0	1	1	24.7	0	68.4	0	68.4	0	68.4
933261	0	1	5.1	5.81	2.88	2	1	0.45	131	83	9.9	1	0	1	0	0	1	1	0	77.9	1	6.2	0	77.9	0	77.9
934669	0	0	1.7	6.63	2.65	1	1	0.37	124	71	8.87	0	0	0	0	0	1	0	0	57	0	57	0	57	0	57
936134	0	1	3.8	7.49		2	1	0.82	142	104	11.67	0	0	1	0	0	0	0	0	85.3	0	85.3	0	85.3	0	85.3
938249	0	1	4	9.89	1.24	3	1	0.15	114	68	8.33	0	0	0	0	0	1	1	0	85.1	1	61	0	85.1	0	85.1
939923	0	1	3.3	5.78	2.95	1	1	0.17	116	72	8.67	0	0	0	0	0	1	1	0	88.6	1	1	0	88.6	0	88.6
940191	1	1	2.8	4.7		0.5	0	0.32	120	83	9.53	0	0	1	0	0	1	1	1	9.7	1	7.4	1	9.7	0	81.2
940282	0	1	5.2	10.52	2.79	2	1	0.2	115	75	8.83	1	0	1	0	0	1	1	1	1.2	1	38.5	1	38.5	0	81.3
940347	1	0	2.2	8.87	2.94	3	1	0.33	116	52	7.33	0	0	0	0	0	1	0	0	48.5	1	3.4	0	48.5	0	48.5
940660	1	0	3.2	8.54	7.7	1	1	1.22	141	84	10.3	1	0	1	1	0	1	1	1	1.8	0	48.1	0	61.2	1	48.1
941000	0	0	3.1	6.73	3.18	0.5	0	0.19	117	74	8.83	0	0	1	0	0	1	0	0	27.3	1	1.8	0	27.3	0	27.3
941031	0	1	3.5	8.84	2.65	1	1	0.22	114	72	8.6	0	0	0	0	0	1	1	0	78.3	1	9.6	0	78.3	0	78.3
944992	0	1	3.3	8.17	1.47	1	1	0.89	99	63	7.5	1	0	1	0	0	1	0	0	10.8	0	10.8	0	10.8	0	12
945398	0	1	4.8	5.77	3.11	1	1	0.04	105	76	8.57	0	0	0	0	0	1	1	1	2.8	1	0	1	2.8	0	39.4
949014	0	0	2.5	8.98	5.13	1	1	0.5	128	73	9.13	1	0	1	0	0	0	0	0	11.3	0	11.3	0	11.3	0	12
952192	0	1	4	9.25		2	1	0.28	111	79	8.97	1	0	1	0	1	1	1	1	4.8	1	1.7	1	4.8	0	82.7
953099	1	0	3.1	8.39	4.79	0.5	0	0.52	117	81	9.3	0	0	1	0	0	0	0	1	7.8	1	7.8	1	7.8	0	28.7
953686	1	0	2.6	8.96	4.48	2	1	0.72	137	80	9.9	1	0	1	0	0	1	1	1	72.3	1	76	1	76	0	85.7
955292	0	1	4.1	5.5	4.57	3	1	2.1	143	88	10.63	1	0	1	0	0	1	1	0	71.9	0	71.9	0	86.2	1	71.9
955778	1	1	3.5	6.61	2.34	2	1	0.76	103	82	8.9	0	0	1	1	1	1	1	1	3	1	1.1	1	3	0	85.7
957374	0	1	4.1	7.32		2	1	0.7	132	62	8.53	1	0	1	1	1	1	1	1	1.3	0	18.9	0	18.9	0	18.9
960079	1	1	2.2	5.28	1.79	2	1	0.05	126	88	10.07	0	0	0	0	0	1	1	0	81.9	1	0	0	81.9	0	81.9
960199	0	1	2.2	5.05	2.65	2	1	0.37	116	79	9.13	1	0	0	0	1	1	1	0	84	1	1.6	0	84	0	84
962915	0	0	4.7	11.1		1	1	0.71	131	83	9.9	1	0	1	1	0	1	1	0	72.5	0	72.5	0	72.5	1	72.5
963184	1	0	2.5	9.09	3.38	2	1	0.48	139	91	10.7	1	0	1	0	0	1	1	1	42.8	1	9.1	1	42.8	0	65.1
964637	0	1	2.5	5.36	6.42	2	1	0.5	122	66	8.47	0	0	1	0	0	0	0	1	29.3	1	3	1	29.3	0	45.6
964929	0	1	1.7	6.47	2.35	3	1	1.5	107	83	9.1	1	0	1	0	0	0	0	0	19.1	0	19.1	0	19.1	0	19.1
969326	0	1	5.2	5.75	2.4	3	1	0.22	109	65	7.97	1	0	0	0	0	0	1	1	32.3	1	18.5	0	62.6	0	62.6
970493	1	0	3.1	6.42	1.71	2	1	0.43	134	103	11.33	1	0	0	0	0	1	1	0	82.6	1	64	0	82.6	0	82.6
972138	1	0	2.2	7.64		3	1	1.5	123	84	9.7	1	0	1	0	0	1	1	1	39.6	1	20.5	1	51.7	0	81.9
974860	1	1	2.4	4.85		3	1	0.5	105	55	7.17	0	0	0	0	0	0	0	1	43.5	1	4	1	43.5	0	81.5
977677	0	1	4.2	6.55	3.45	3	1	0.33	128	76	9.33	0	0	1	0	0	1	1	1	73.3	1	11.4	1	73.3	0	75.6
977717	0	0	5	9.86		2	1	1.29	114	62	7.93	0	0	1	1	1	0	1	0	68.9	0	68.9	0	68.9	1	18.9
977782	0	1	4.7	7.81	2.39	2	1	0.17	126	73	9.07	1	0	1	0	0	1	1	1	25.8	1	1.2	1	25.8	0	79.3
983851	1	0	1.5	7.77		3	1	0.02	131	92	10.5	1	0	1	0	0	1	0	1	11.5	1	6.4	1	11.5	0	78.8
984803	1	1	2.5	4.96	2.92	3	1	0.4	97	64	7.5	1	0	1	0	1	0	1	0	27.2	0	27.2	0	27.2	0	27.2
984886	0	0	2.8	7.92		2	1	0.5	119	79	9.23	1	0	1	0	0	1	1	0	45.5	1	0.4	0	45.5	0	45.5
985281	0	1	2.5	7.36	1.55	2	1	2.34	151	96	11.43	0	0	1	2	0	0	1	0	25.8	0	25.8	0	25.8	1	25.8
986692	0	1	4	7.82		2	1	1.23	111	70	8.37	0	0	1	1	1	0	1	1	52.4	1	17.9	0	77.3	0	77.3
986898	1	1	1.5	9.86	1.49	3	1	6.09	134	91	10.53	1	1	1	0	1	1	0	1	18.6	1	3.2	1	18.6	0	76.1
988386	1	1	2	6.62	1.84	3	1	0.62	117	78	9.1	1	0	1	0	1	1	1	0	16.8	0	16.8	0	16.8	0	16.8
988598	1	1	3.5	7.55	2.07	0.5	0	2.5	128	94	10.53	1	0	1	1	0	1	1	1	61.1	0	76.1	0	76.1	0	76.1
988791	1	0	3.4	9.71	2.89	1	1	0.37	122	74	9	1	0	1	1	0	1	1	1	1.4	1	1.4	1	1.4	0	77.8
988806	1	1	2.2	5.25		2	1	0.3	107	66	7.97	0	0	1	0	0	0	0	0	79.5	0	79.5	0	79.5	0	79.5
989635	0	0	2.4	7.17		3	1	0.83	152	84	10.67	1	0	1	0	0	1	1	1	17	1	10.8	1	17	0	47.5
990209	1	1	2.6	9.35	6.32	2	1	0.3	97	62	7.37	0	0	0	0	0	0	0	1	1	1	1	1	1	0	77.1
990352	0	1	3.1	6.06		2	1	0.4	138	97	11.07	1	0	1	0	1	1	1	1	18.2	1	5.4	1	18.2	0	44.2
990384	1	1	3.5	8.19	2.91	3	1	0.43	97	60	7.23	1	0	1	0	0	1	0	0	72.9	1	0.8	0	72.9	0	72.9
991123	1	1	2	5.81	3.75	2	1	0.34	108	78	8.8	1	0	1	0	0	1	0	1	18.4	1	2.5	1	18.4	0	43
995730	0	0	2.4	7.71	3.03	0.5	0	0.5	128	76	9.33	1	0	1	0	0	1	1	1	1.4	1	1.4	1	1.4	0	72.5
996950	1	0	2.6	9.62	5.12	2	1	0.39	143	91	10.83	1	0	1	0	0	0	1	0	42.3	1	1.8	0	42.3	0	42.3
997123	0	1	3.7	6.89	3.19	3	1	1.92	123	81	9.5	1	0	1	1	1	0	1	0	38.6	0	38.6	0	38.6	0	38.6
997577	0	1	3.1	5.41	4.63	1	1	1.01	103	71	8.17	0	0	1	0	0	1	1	0	76.8	1	5.9	0	76.8	0	76.8
997767	0	1	2.5	4.99	2.08	3	1	1.48	123	72	8.9	1	0	1	0	0	0	1	1	35.2	1	35.2	1	35.2	0	76.4
999251	1	1	4	11.7	3.7	3	1	1.14	128	91	10.33	1	0	1	1	0	1	1	1	14.3	1	4.4	1	14.3	0	78.4
999257	1	0	2.8	12.31	3.31	0	0	1.1	132	71	9.13	1	0	1	1	0	1	1	1	0	0	37	0	37	1	37
999606	0	1	2.5	6.9	2.43	3	1	4.16	114	87	9.6	1	0	1	1	1	1	0	0	21.1	0	21.1	0	21.1	0	21.1
999773	0	0	3.9	5.91		1	1	2.25	135	84	10.1	1	0	1	0	0	0	0	0	17.5	0	17.5	0	17.5	0	17.5
999873	0	0	3.9	18.25	2.75	2	1	1.33	104	66	7.87	1	0	0	0	0	0	1	1	62.7	0	74.5	0	74.5	0	74.5
1000279	1	1	2.8	6.64	1.92	3	1	0.55	131	81	9.77	1	0	1	0	0	0	1	1	47.1	1	1.5	1	47.1	0	50.2
1000494	0	0	3.3	9.29	3.46	1	1	0.53	135	96	10.9	1	0	1	0	0	1	1	1	17.5	1	5.3	1	50.3	0	77.3
1000580	1	0	3.1	8.83	2.73	3	1	0.3	111	81	9.1	1	0	1	0	1	1	1	1	41.6	1	0.6	1	41.6	0	70.1
1000846	0	1	3.3	4.95		0.5	0	0.54	132	90	10.4	1	0	1	0	0	0	1	1	3.2	1	1.8	1	3.2	0	63.4
1001720	0	0	2.6	8.09	3.6	2	1	1.15	147	77	10.03	1	0	0	0	0	0	0	0	65	1	14.1	0	65	0	65
1004662	1	0	1.7	6.38	2.86	2	1	0.29	108	76	8.67	0	0	0	0	0	1	1	0	52.6	1	8.7	0	52.6	0	52.6
1004668	0	1	4	4.7	2.22	2	1	0.11	95	68	7.7	0	0	0	0	0	0	0	0	67.4	1	0	0	67.4	0	67.4
1004729	1	1	3.3	6.62	4.63	1	1	0.32	117	76	8.97	1	0	1	0	1	1	1	0	18.7	0	18.7	0	18.7	0	18.7
1004758	1	0	2.7	7.03	2.2	1	1	0.5	142	69	9.33	0	0	1	0	0	1	1	1	14.7	1	9.2	1	14.7	0	73.6
1005841	0	0	3.6	7.21		1	1	0.29	104	60	7.47	1	0	1	0	1	0	0	1	50.4	1	52.9	1	52.9	0	73.2
1006215	0	1	3.4	8.49	2.93	0.5	0	0.66	133	106	11.5	1	0	1	0	0	1	1	1	2	0	69.6	0	69.6	0	69.6
1006337	1	0	1.8	6.26	1.36	3	1	1.16	116	68	8.4	1	0	0	0	0	0	1	0	18.9	0	18.9	0	18.9	0	18.9
1006779	0	0	1.6	6.81	3	0.5	0	0.22	112	67	8.2	0	0	0	0	0	0	0	1	0.3	1	23.7	1	23.7	0	66.4
1007950	0	0	2.8	6.64	4.44	2	1	2.9	128	94	10.53	1	0	1	0	0	1	1	0	57.1	0	57.1	0	57.1	0	57.1
1008090	1	0	2.5	7.22	2.62	2	1	0.28	117	73	8.77	0	0	0	0	0	1	1	1	23.7	1	0.6	1	23.7	0	69.9
1008559	1	1	2.6	5.07	2.29	3	1	0.39	102	62	7.53	1	0	1	0	0	1	1	0	59.1	1	24	0	59.1	0	59.1
1009111	0	1	2.6	5.95	2.64	3	1	0.24	99	60	7.3	1	0	0	0	0	0	0	0	18.6	1	3.9	0	68.7	1	18.6
1009692	1	0	4.5	8.34	4.09	3	1	0.45	116	73	8.73	1	0	1	0	0	1	1	0	73.2	1	1.5	0	73.2	0	73.2
1009741	1	0	3.6	13.08	2.58	1	1	1.5	116	87	9.67	1	0	1	1	0	0	0	1	4.9	1	2.1	1	4.9	0	75.9
1011742	1	0	3.9	11.64	2.36	2	1	0.51	130	86	10.07	1	0	1	0	0	1	1	1	7.7	1	1.1	1	7.7	0	15.9
1011841	0	0	2.4	7.06	2.72	3	1	0.9	128	88	10.13	1	0	1	0	0	0	1	1	24.1	1	2.8	1	24.1	0	50.4
1012273	1	0	2.7	8.94	2.97	0	0	0.43	131	93	10.57	1	0	1	1	0	1	1	1	33.9	1	3	1	33.9	0	75.7
1012995	0	0	1.9	6.55	2.72	2	1	0.5	139	86	10.37	1	0	1	0	0	1	1	1	18	1	18	1	18	0	56.9
1013252	0	0	2.4	7.39	2.46	2	1	0.3	109	73	8.5	0	0	1	0	0	0	0	1	11.9	1	1.8	1	11.9	0	30.4
1013357	1	1	3.3	5.47	4.59	3	1	0.45	123	94	10.37	1	0	1	0	0	1	1	0	55.1	1	8.7	0	55.1	0	55.1
1013876	1	1	2.6	6.7	3.95	3	1	0.61	108	79	8.87	1	0	1	0	1	0	1	1	12.6	1	12.6	1	12.6	0	21.8
1018338	0	0	3.9	10.76	2.55	1	1	1.51	156	94	11.47	1	0	1	1	0	0	1	0	69.2	0	69.2	0	69.2	0	69.2
1019370	0	1	2.3	5.23	2.49	1	1	0.35	120	70	8.67	1	0	1	0	0	0	0	0	40.8	1	1.8	0	40.8	0	40.8
1019626	0	0	2.4	10.64	2.79	3	1	0.48	112	65	8.07	1	0	1	1	1	0	1	0	69.1	1	1.9	0	69.1	0	69.1
1020636	1	0	1.7	6.17	1.79	2	1	0.17	128	82	9.73	0	0	0	0	0	0	1	1	45.6	1	14.9	1	45.6	0	50.8
1020804	0	1	3.8	8.6	2.84	3	1	0.17	101	67	7.83	0	0	0	0	0	1	1	0	73.6	1	4.9	0	73.6	0	73.6
1022185	1	0	4.1	6.83	3.29	0.5	0	0.24	113	79	9.03	1	0	0	0	0	1	1	1	8.8	1	1.6	1	8.8	0	74.1
1022362	0	0	2.7	6.9	2.51	1	1	0.17	136	96	10.93	1	0	0	0	0	0	0	0	21.7	1	3.3	0	21.7	0	21.7
1024403	1	0	3.1	11.35	4.62	1	1	0.18	186	102	13	1	0	1	1	0	0	1	1	13.9	1	0.5	1	13.9	0	68.8
1024958	0	0	3.7	8.28	1.93	0.5	0	0.23	120	70	8.67	1	0	0	0	0	0	0	0	47.7	0	47.7	0	47.7	0	47.7
1025099	0	1	2.3	4.61	3.22	2	1	0.5	133	85	10.1	0	0	0	0	0	0	0	0	59.2	0	59.2	0	59.2	0	59.2
1025184	1	1	2.8	6	2.16	3	1	0.81	116	86	9.6	1	0	1	0	0	1	0	0	65.1	1	48.4	0	65.1	0	65.1
1025315	0	0	1.8	9.07	1.52	0.5	0	1.5	131	77	9.5	1	0	1	1	1	1	1	0	12.9	0	12.9	0	12.9	0	12.9
1025884	1	0	2.1	5.84	1.84	3	1	0.61	129	80	9.63	1	0	1	0	0	1	1	0	49.9	0	49.9	0	49.9	0	49.9
1025900	1	1	2.4	4.66	3.17	3	1	0.42	123	81	9.5	0	0	0	0	0	1	1	0	61.9	0	61.9	0	61.9	0	61.9
1027338	1	1	4.9	5.02		1	1	0.15	126	88	10.07	1	0	1	0	0	0	0	1	11	1	0	1	11	0	39.1
1027551	1	1	2.6	4.75	2.7	1	1	0.19	129	73	9.17	0	0	1	0	0	0	1	1	39.8	1	2.5	1	39.8	0	65.4
1028890	1	0	4.3	10.41	4.77	1	1	0.87	119	80	9.3	1	0	1	1	0	0	1	1	4.7	1	2.7	1	4.7	0	57.6
1029470	1	0	3.8	14.55	2.26	2	1	1.51	148	96	11.33	1	0	1	1	1	1	1	1	18.9	0	72.4	0	72.4	0	72.4
1030333	1	1	2.3	5.08	2.85	2	1	0.49	148	109	12.2	1	0	1	1	0	0	1	1	39.5	0	67.4	0	67.4	0	67.4
1031380	0	1	2.6	6.01		2	1	0.42	122	85	9.73	1	0	1	0	1	1	0	1	28.7	1	28.7	1	28.7	0	45.1
1032299	1	1	2.6	6.82	2.9	2	1	0.56	134	89	10.4	1	0	1	0	1	1	1	1	10.6	1	2.3	1	10.6	0	59.6
1032461	1	0	2.6	8.57		0	0	0.23	131	90	10.37	0	0	1	0	0	0	1	1	0	1	46	1	46	0	49.4
1032545	0	0	2	8.29	3	3	1	3.11	125	84	9.77	0	0	1	0	1	1	1	0	50.4	0	50.4	0	50.4	0	50.4
1032885	0	1	2.4	5.99	2.51	0	0	0.53	105	64	7.77	1	0	1	0	0	1	1	1	5.3	1	5.3	1	5.3	0	62.9
1035237	1	0	2.4	6.58	3.77	3	1	0.68	123	71	8.83	1	0	1	0	1	0	0	0	23.6	0	23.6	0	23.6	0	23.6
1035289	1	0	4.1	8.43	5.17	1	1	1.64	171	95	12.03	1	0	1	0	1	1	1	1	1.9	1	0.9	1	1.9	0	13.9
1036221	0	1	2.1	5.6	2.48	2	1	0.15	111	70	8.37	1	0	0	0	0	1	0	0	13.1	1	0.8	0	13.1	0	13.1
1036632	0	0	3.1	13.24	2.86	3	1	3.2	126	95	10.53	1	0	1	1	0	1	0	1	25.5	0	67.4	0	67.4	0	67.4
1039353	1	1	3.2	3.88	2.25	2	1	1.46	137	85	10.23	1	0	1	0	1	1	1	1	9.6	1	9.6	1	9.6	0	49.4
1039669	1	1	3.7	5.24		1	1	0.2	145	93	11.03	0	0	0	0	0	0	1	1	0.5	1	0.5	1	0.5	0	69.1
1040639	0	1	2.9	4.42	2.51	0.5	0	0.15	127	83	9.77	1	0	0	0	0	0	0	0	15.2	1	0	0	15.2	0	15.2
1041476	1	1	4.2	5.58	3.85	2	1	0.16	112	79	9	0	0	0	0	0	0	0	1	11.4	1	0.6	1	11.4	0	63.2
1041619	1	1	3.8	5.88	1.4	1	1	0.36	109	84	9.23	1	0	1	1	0	1	1	1	6	0	69.8	0	69.8	0	69.8
1041759	1	0	2.7	9.27	2.47	2	1	2.89	120	71	8.73	1	0	1	0	1	1	1	1	5.9	1	21.6	1	21.6	0	53.8
1044258	1	0	2	11.88		3	1	1.4	121	69	8.63	1	0	1	0	2	1	1	1	31.1	0	69.1	0	69.1	0	69.1
1045123	1	1	2.7	4.69	1.5	3	1	3.91	107	81	8.97	1	0	1	0	0	0	1	1	14.5	0	69.2	0	69.2	0	69.2
1045329	0	1	2.2	5.64	1.89	3	1	0.43	127	75	9.23	1	0	1	0	0	1	1	1	15.2	1	10.1	1	15.2	0	61.7
1046674	0	1	4.5	5.86	1.23	2	1	0.14	104	74	8.4	0	0	0	0	0	0	1	1	38.6	1	0	1	38.6	0	69.4
1047327	0	0	2.4	7.98	2.8	2	1	1.11	135	75	9.5	1	0	0	0	1	0	1	1	42.2	1	42.2	1	42.2	0	68.2
1047486	1	0	2.8	10.32	2.07	2	1	0.93	148	102	11.73	1	0	1	1	0	1	1	1	17.3	1	43.4	1	43.4	0	68
1047563	0	1	4.6	5.66	1.25	2	1	0.12	135	83	10.03	1	0	1	0	0	0	0	1	0.5	1	23.8	0	41.1	0	41.1
1051183	0	1	2.4	4.12	5.9	2	1	2.5	121	82	9.5	1	0	1	0	1	1	1	0	66.5	0	66.5	0	66.5	0	66.5
1052218	0	1	3	5.71	1.74	3	1	2.55	108	82	9.07	1	0	1	0	1	1	1	0	30.8	0	30.8	0	30.8	0	30.8
1052287	0	1	2.2	5.01	1.48	3	1	1.81	129	97	10.77	1	0	1	0	0	0	0	0	67.3	0	67.3	0	67.3	0	67.3
1053477	0	1	4	7.03	3.39	3	1	0.53	120	82	9.47	0	0	1	1	1	1	1	0	67.5	1	2.8	0	67.5	0	67.5
1054146	1	0	2.1	9.03	3.17	2	1	0.86	106	73	8.4	0	0	1	0	1	0	1	0	14.3	0	14.3	0	14.3	0	14.3
1054188	0	0	1.9	6.01	1.46	2	1	2.4	132	94	10.67	1	0	0	0	0	1	0	0	27	0	27	0	27	0	27
1055982	0	1	4.5	11.55	3.78	2	1	2.17	136	86	10.27	1	0	1	1	0	0	0	0	67.3	0	67.3	0	67.3	1	17.3
1058387	1	0	2.9	7.93	2.65	0	0	1.18	126	78	9.4	0	0	1	1	0	0	1	1	43.2	1	43.2	1	43.2	0	65
1059643	1	1	2.9	7.1	4.69	2	1	1.58	123	92	10.23	1	0	1	1	0	1	1	1	22.8	1	22.8	1	22.8	0	66
1060123	1	1	2.7	4.46	3.73	3	1	1.06	119	76	9.03	1	0	0	0	0	1	0	0	49	1	28.3	0	49	0	49
1060254	0	1	3.6	9.85	2.87	1	1	0.48	112	62	7.87	0	0	0	1	0	0	1	1	15.6	0	67.1	0	67.1	1	67.1
1061498	1	1	3.8	6.25	2.79	1	1	1.5	125	84	9.77	0	0	0	0	0	0	1	1	22.6	1	22.6	1	22.6	0	40.9
1061520	1	1	2.1	7.54	3.37	2	1	1.5	141	98	11.23	0	0	1	1	0	0	0	0	62.1	0	62.1	0	62.1	0	62.1
1061936	0	0	2.7	8.62		1	1	0.13	104	74	8.4	0	0	1	0	1	0	1	0	46.2	1	0	0	46.2	0	46.2
1062410	1	1	2.6	7.52	3.32	2	1	0.5	130	84	9.93	1	0	0	0	0	0	0	0	39.1	0	39.1	0	39.1	0	39.1
1062603	0	1	2.8	4.51	2.26	1	1	1.2	115	78	9.03	0	0	1	0	1	0	0	0	65.4	0	65.4	0	65.4	0	65.4
1063237	0	1	2	10.47	2.22	2	1	2.46	157	109	12.5	1	0	1	1	2	0	1	0	28.9	0	28.9	0	28.9	1	28.9
1063736	0	0	3.6	7.75	2.84	0.5	0	0.98	138	83	10.13	0	0	1	0	0	0	0	1	1.3	1	25.7	1	25.7	0	62.5
1064609	0	0	2.6	7.82		1	1	0.24	122	84	9.67	0	0	1	0	0	0	0	0	39.8	0	39.8	0	39.8	0	39.8
1065804	1	1	2.4	5.96		2	1	0.23	124	69	8.73	1	0	0	0	0	0	0	1	10.6	1	0.4	1	10.6	0	33.7
1066162	1	1	2.8	4.68	2.5	3	1	0.12	110	74	8.6	0	0	0	0	0	0	0	0	49.8	1	2.3	0	49.8	0	49.8
1066444	1	1	2.2	6.02		2	1	0.09	100	68	7.87	0	0	0	0	0	0	0	0	13.7	1	0	0	13.7	0	13.7
1066594	0	0	2.6	9.73	1.09	2	1	0.89	131	85	10.03	0	0	1	0	0	0	0	0	25.3	0	25.3	0	25.3	0	25.3
1067453	0	1	2.1	5.46	1.73	2	1	0.25	108	70	8.27	0	0	0	0	0	0	0	0	14.7	1	5.6	0	14.7	0	14.7
1068182	1	1	3.2	4.51	3.4	2	1	0.47	105	65	7.83	0	0	0	0	0	1	1	0	64.8	1	2.3	0	64.8	0	64.8
1068201	1	1	2.5	5.64	2.61	2	1	0.07	103	76	8.5	0	0	0	0	0	1	0	0	54.3	1	0	0	54.3	0	54.3
1068221	0	1	2.3	6.19	3.51	2	1	0.82	107	70	8.23	0	0	1	0	2	0	1	1	28.3	1	37.8	1	48.5	0	62.5
1068807	1	0	2.3	9.97	1.67	0.5	0	0.46	118	72	8.73	1	0	1	0	1	1	1	1	44.6	1	4.1	0	66	0	66
1068994	1	1	2.8	7.49	3.52	3	1	1.08	113	69	8.37	1	0	0	0	0	1	1	0	61.8	0	61.8	0	61.8	0	61.8
1069281	0	1	2.3	4.9	5.06	3	1	2.54	107	70	8.23	0	0	1	0	1	1	0	0	45.7	0	45.7	0	45.7	0	45.7
1069563	1	1	3	8.84	3.69	0.5	0	0.58	105	86	9.23	0	0	1	0	0	1	1	1	11.2	1	11.2	1	11.2	0	65.3
1069797	0	1	4.5	10.53	4.07	0.5	0	0.78	111	75	8.7	1	0	1	1	1	1	1	1	36.2	0	57.6	0	57.6	0	57.6
1070341	1	0	2.8	11.87	2.84	3	1	2.5	129	80	9.63	0	0	1	0	1	1	1	0	52.1	0	52.1	0	52.1	0	52.1
1070728	0	0	2.5	8.35		2	1	0.31	149	96	11.37	0	0	0	0	0	1	1	1	58	1	1.5	1	60.3	0	63.3
1070974	1	1	1.7	5.49		2	1	0.21	110	70	8.33	0	0	1	0	0	0	0	0	47.4	0	47.4	0	47.4	0	47.4
1071286	0	0	1.5	10.7	3.46	3	1	1.67	153	74	10.03	1	1	0	0	0	1	1	0	63.7	1	39.3	0	63.7	0	63.7
1071565	0	1	2.6	18.24	2.9	2	1	0.21	109	69	8.23	1	0	0	2	0	1	1	0	45.9	0	45.9	0	45.9	0	45.9
1073149	1	1	2.6	4.06	1.73	2	1	0.5	98	53	6.8	0	0	0	0	0	0	0	0	26.8	1	1.2	0	26.8	0	26.8
1073743	1	0	2.8	8.9		2	1	0.5	127	80	9.57	0	0	1	0	0	0	1	1	1.2	1	2.2	1	2.2	0	65.3
1079206	0	1	3	6.73	2.18	2	1	0.5	114	94	10.07	0	0	1	0	0	0	0	1	0.4	1	0.4	1	0.4	0	65
1079842	1	0	2.2	25.39		3	1	4.7	154	92	11.27	0	0	0	2	1	0	0	0	17.9	0	17.9	0	17.9	1	17.9
1080997	0	0	2.1	8.17	1.96	2	1	0.24	132	90	10.4	1	0	1	0	0	1	1	1	23.3	0	64.9	0	64.9	0	64.9
1081703	0	0	4.9	11.8	4.13	1	1	0.58	109	81	9.03	1	0	1	1	0	1	1	1	9.4	1	51.7	1	51.7	1	46.2
1083540	1	1	4.1	9.4		2	1	0.5	136	93	10.73	1	0	1	1	1	0	1	1	37.9	0	51	0	51	0	51
1087195	0	0	3.6	9	2.82	0.5	0	0.11	136	98	11.07	1	0	1	0	1	0	1	1	5.1	1	5.1	1	5.1	0	60.8
1087925	1	0	3.5	8.35	2.56	2	1	0.21	130	77	9.47	1	0	1	0	0	1	1	1	8	1	28.3	1	28.3	0	60.6
1088059	0	1	2.6	12.38	2.49	0.5	0	0.31	118	77	9.07	1	0	1	0	0	1	1	1	25	0	61.4	0	61.4	0	61.4
1089001	0	0	2.9	8.01	3.13	3	1	0.24	127	83	9.77	1	0	1	0	0	1	1	0	62.2	1	8.6	0	62.2	0	62.2
1091153	0	1	2.8	5.29	2.61	3	1	0.25	111	75	8.7	1	0	0	0	0	1	0	0	62.5	0	62.5	0	62.5	0	62.5
1092143	0	1	2.9	6.01	2.6	2	1	0.66	118	75	8.93	0	0	1	0	1	1	1	0	48.5	0	48.5	0	48.5	0	48.5
1092546	1	1	3.8	5.9	4.26	3	1	0.47	141	82	10.17	1	0	1	0	0	1	0	0	61.4	1	0.9	0	61.4	0	61.4
1093854	1	1	2.5	7.22	1.33	2	1	1.96	123	83	9.63	1	0	1	0	0	0	1	0	28.7	0	28.7	0	28.7	0	28.7
1096501	0	1	2.6	4.43		2	1	2.23	118	85	9.6	0	0	1	0	0	0	0	0	14	0	14	0	14	0	14
1097900	1	1	3.6	5.6	3.11	0.5	0	0.22	123	76	9.17	1	0	1	0	0	1	1	0	60.5	0	60.5	0	60.5	0	60.5
1098813	0	1	3.8	5.73		2	1	0.09	115	77	8.97	0	0	1	0	1	1	1	0	44	1	0	0	44	0	44
1102328	0	0	4.1	8.31	1.99	3	1	0.55	134	87	10.27	1	0	1	0	0	0	0	0	57	0	57	0	57	0	57
1102804	0	0	3.4	9.08	4.75	2	1	1.19	123	79	9.37	1	0	1	0	0	0	1	1	44.7	0	59.4	0	59.4	0	59.4
1105118	0	0	2.7	9.4	6.19	1	1	0.54	131	78	9.57	1	0	1	0	1	1	1	1	14.7	1	6.9	1	14.7	0	51
1108766	0	1	2.4	13.56	3.35	3	1	3.01	122	84	9.67	0	0	1	1	0	1	1	1	11.9	0	28.8	0	33.7	1	28.8
1109316	0	1	3.8	5.16		2	1	0.25	120	89	9.93	0	0	1	0	0	1	1	1	10	1	6.6	1	10	0	58
1110159	0	0	1.6	9.39	4.13	3	1	0.9	121	66	8.43	1	0	1	0	1	1	1	0	58.7	0	58.7	0	58.7	0	58.7
1110883	1	0	3.6	8.57	4.35	0.5	0	0.67	106	75	8.53	0	0	0	0	0	0	1	1	3.8	1	3.8	1	3.8	0	58.5
1111264	0	0	3.5	14.81	1.85	0.5	0	0.33	114	75	8.8	0	0	1	0	0	1	1	1	17.9	1	29.5	1	29.5	0	56.8
1112381	1	1	2.2	6.72	3.25	2	1	0.12	111	84	9.3	0	0	1	0	1	0	0	0	53	1	0	0	53	0	53
1115568	0	1	3.2	9.59	3.53	0.5	0	0.45	148	101	11.67	1	0	1	1	0	0	1	0	49.9	1	7.5	0	49.9	0	49.9
1116055	0	1	2	9.51	2.07	2	1	1.78	130	91	10.4	1	0	1	1	1	0	1	0	49.2	0	49.2	0	49.2	0	49.2
1116166	1	1	3.9	6.94	2.92	3	1	0.28	121	71	8.77	0	0	1	0	0	0	1	1	28.1	1	17.5	1	28.1	0	58.8
1117014	1	1	2.7	4.65	2.72	3	1	0.5	133	88	10.3	1	0	1	0	0	1	1	0	24.5	1	7.8	0	24.5	0	24.5
1119853	0	0	3.9	10.33	3.1	2	1	0.26	151	84	10.63	1	0	1	0	0	0	1	0	33.1	1	13.6	0	33.1	0	33.1
1120126	0	1	2.3	7.1	2.22	3	1	0.53	125	91	10.23	0	0	0	0	0	0	1	0	42.7	0	42.7	0	42.7	0	42.7
1121275	1	1	2.3	6.77	3.56	3	1	0.33	101	67	7.83	0	0	1	0	0	1	1	1	14.4	1	25.7	1	25.7	0	56.7
1123909	1	1	2.6	3.68	1.33	3	1	1.75	96	67	7.67	0	0	0	0	1	1	1	0	55.7	0	55.7	0	55.7	0	55.7
1124270	1	0	2.5	8.92	1.68	3	1	1.5	115	69	8.43	0	0	0	0	1	0	1	0	52.2	0	52.2	0	52.2	0	52.2
1127084	1	0	2.6	10.09		2	1	0.25	147	90	10.9	0	0	1	1	0	0	1	1	5.6	0	57.5	0	57.5	0	57.5
1127136	1	1	3.2	6.79	2.51	2	1	0.23	115	74	8.77	0	0	1	0	1	0	1	0	17.3	1	0.4	0	17.3	0	17.3
1127455	0	1	3	5.3	2.84	2	1	0.07	112	76	8.8	1	0	0	0	0	0	0	0	47.1	1	0	0	47.1	0	47.1
1127844	0	0	3.5	11.95	4.21	2	1	0.84	134	85	10.13	1	0	1	0	0	1	1	0	49.6	1	16.3	0	49.6	0	49.6
1128670	0	1	3.7	5.83	2.84	3	1	0.5	102	65	7.73	0	0	1	0	1	1	1	0	40.8	0	40.8	0	40.8	0	40.8
1128722	0	1	2.3	5.82	2.11	2	1	0.24	107	60	7.57	0	0	0	0	0	1	1	0	23.7	0	23.7	0	23.7	0	23.7
1130942	0	0	1.6	9.46	1.43	2	1	2.5	122	83	9.6	1	0	1	0	0	1	1	1	3	1	35.3	1	35.3	0	51.4
1132055	1	1	4.9	7		2	1	0.5	138	87	10.4	1	0	1	1	0	1	1	0	24.5	0	24.5	0	24.5	0	24.5
1133004	0	1	3.7	9.89	2.1	2	1	0.39	137	87	10.37	0	0	1	1	0	1	1	1	26.9	1	32.8	1	32.8	0	56.1
1133957	0	0	1.8	9.06		3	1	0.83	120	69	8.6	0	0	1	0	0	1	1	1	22.2	1	7.5	1	22.2	0	55.6
1134226	0	1	2.9	5.91	5.67	2	1	0.05	109	75	8.63	1	0	1	0	0	0	1	1	23.5	1	2	1	23.5	0	37.1
1136805	0	1	3.1	4.32	3.42	2	1	0.06	125	76	9.23	0	0	0	0	0	0	1	0	50.8	1	29.5	0	50.8	0	50.8
1137408	0	1	3.2	7.69	2.1	1	1	0.97	122	72	8.87	1	0	1	1	1	1	1	0	38.8	0	38.8	0	38.8	0	38.8
1137808	0	1	3	5.02	2.62	2	1	0.22	131	96	10.77	0	0	1	0	0	1	1	0	46.8	1	20.1	0	46.8	0	46.8
1138746	0	1	3.7	5.09		1	1	0.25	100	68	7.87	0	0	1	0	0	0	0	1	24.6	1	24.6	1	24.6	0	38.2
1143149	1	1	3.5	5.54		1	1	0.5	128	93	10.47	0	0	1	0	0	0	1	0	13.1	0	13.1	0	13.1	0	13.1
1145548	1	0	3.1	10.19	1.8	1	1	3.5	139	78	9.83	0	0	1	1	0	1	1	1	1.4	0	52.9	0	52.9	0	52.9
1145562	0	1	2.5	4.83	2.24	2	1	0.12	123	80	9.43	0	0	0	0	0	1	1	0	44.2	1	12.9	0	44.2	0	44.2
1147418	1	1	2.5	5.12	3.42	2	1	0.55	117	76	8.97	1	0	1	0	1	0	1	1	5.8	1	5.8	1	5.8	0	49.2
1148019	0	1	3.5	4.79	4.07	1	1	0.25	98	58	7.13	1	0	1	0	0	0	0	0	37.7	1	2.4	0	37.7	0	37.7
1149203	1	1	2.7	6.41	1.67	1	1	1.7	139	73	9.5	1	0	1	0	1	1	0	1	20.9	1	1.2	1	20.9	0	53.7
1151296	1	0	1.5	5.9	1.89	2	1	1.11	91	56	6.77	0	0	0	0	0	1	1	0	51.7	0	51.7	0	51.7	0	51.7
1152706	0	1	2.5	6.87		1	1	0.15	112	74	8.67	0	0	1	0	0	1	1	0	22.7	0	22.7	0	22.7	0	22.7
1155717	1	1	2.7	6.21	1.95	0.5	0	0.35	147	98	11.43	0	0	1	0	0	1	1	1	6	1	6	1	6	0	35.2
1156488	0	0	2.6	10.28	3.58	2	1	0.14	110	72	8.47	0	0	1	1	0	0	1	0	26.7	0	26.7	0	26.7	0	26.7
1158025	1	1	3.9	4.9		2	1	0.08	123	85	9.77	1	0	1	0	0	0	1	0	50.8	1	0	0	50.8	0	50.8
1159165	0	1	2.6	6.52	3.85	2	1	0.79	120	86	9.73	0	0	1	0	0	1	0	0	48.3	0	48.3	0	48.3	0	48.3
1162371	1	1	2.9	5.49	2.85	3	1	0.37	130	95	10.67	1	0	1	0	1	1	1	0	50.6	1	12	0	50.6	0	50.6
1162373	0	0	3.4	8.61		2	1	0.45	121	95	10.37	0	0	1	0	1	1	1	1	10.8	1	3.6	1	10.8	0	45.1
1162394	0	0	2.2	7.57	2.11	1	1	0.52	130	68	8.87	0	0	1	0	0	0	1	1	5.8	0	14.3	0	14.3	0	14.3
1162718	0	0	1.8	9.37	1.46	3	1	0.17	138	77	9.73	1	0	1	1	0	0	1	1	1.6	1	27.6	1	27.6	0	50.7
1163368	0	0	1.9	7.42	4.62	2	1	0.5	136	80	9.87	0	0	0	0	0	0	1	1	10.8	1	0.5	1	10.8	0	19.7
1163369	0	0	1.9	6.04	2.79	0.5	0	0.48	123	75	9.1	1	0	1	0	0	0	1	1	15.7	1	32.8	1	32.8	0	51
1163479	0	0	2.9	6	1.6	3	1	0.44	137	83	10.1	1	0	1	0	1	1	1	0	47.9	0	47.9	0	47.9	0	47.9
1163819	1	1	4.5	5.29	3.45	1	1	0.14	158	95	11.6	0	0	1	0	0	0	1	1	7.4	0	28.7	0	28.7	0	28.7
1167378	1	0	3.5	11.48		0	0	0.64	144	95	11.13	0	0	1	0	0	0	1	1	0	0	49.6	0	49.6	0	49.6
1167381	0	0	2.4	7.49	2.21	2	1	0.17	128	80	9.6	0	0	0	0	0	0	0	1	2.3	1	0.9	1	2.3	0	15.4
1167389	1	1	3.2	5.25		2	1	0.5	117	58	7.77	0	0	1	0	0	0	0	1	8.5	1	8.5	1	8.5	0	41.1
1167817	1	1	2.1	5.61	2.67	2	1	0.06	108	69	8.2	0	0	1	0	0	0	1	1	30.1	1	10.3	1	30.1	0	47.2
1170378	0	1	2.3	11.78	3.79	2	1	2.05	134	102	11.27	1	0	1	1	1	1	1	0	17.7	0	17.7	0	22.8	1	17.7
1170382	0	0	2.1	7.35	1.43	2	1	0.5	144	82	10.27	0	0	1	0	0	1	1	0	47.3	1	25.5	0	47.3	0	47.3
1173265	0	1	4.2	12.87	1.48	2	1	0.51	147	98	11.43	1	0	1	1	0	1	1	0	47.3	0	47.3	0	49.4	1	47.3
1174957	1	0	2.7	6.97	4.05	3	1	1.5	117	90	9.9	1	0	1	0	0	0	0	1	21.3	1	5.7	1	17.6	0	47.1
1178008	0	1	3	4.83	3.11	3	1	1.03	131	84	9.97	0	0	1	0	0	0	0	0	17.1	0	17.1	0	17.1	0	17.1
1178188	1	0	2.4	6.7		1	1	1.22	135	83	10.03	0	0	1	0	1	0	1	1	17.3	0	41.8	0	41.8	0	41.8
1181180	0	0	3.5	8.02	2.05	2	1	2.17	128	86	10	1	0	1	0	0	0	0	1	6.7	1	6.7	1	6.7	0	48.5
1181301	0	1	2.1	6.99		1	1	0.52	113	70	8.43	0	0	1	1	0	1	1	1	7.9	1	14.6	1	14.6	0	44
1181318	0	1	1.6	4.07	3.07	3	1	0.2	126	65	8.53	0	0	1	0	0	1	1	1	25.7	1	3.9	1	25.7	0	50.3
1181332	0	1	3.7	7.62	2.23	1	1	0.82	111	74	8.63	0	0	1	1	1	1	1	1	19.3	1	34	1	34	0	48.6
1182630	0	0	2	6.55	2.32	3	1	0.18	132	68	8.93	0	0	1	0	0	1	1	0	49	0	49	0	49	0	49
1182821	1	1	2.4	5.5	2.19	2	1	0.89	96	56	6.93	1	0	1	0	1	1	0	0	38.4	0	38.4	0	38.4	0	38.4
1184450	1	1	2.1	5.81		2	1	0.5	131	92	10.5	0	0	0	0	0	0	1	0	20.4	0	20.4	0	20.4	0	20.4
1186150	0	1	2.7	7.32	2.65	2	1	1.59	145	99	11.43	0	0	1	1	0	1	1	1	4	0	43.5	0	43.5	0	43.5
1187512	0	0	2.4	7.49	5.04	2	1	0.76	118	65	8.27	0	0	1	0	1	0	1	0	48.7	0	48.7	0	48.7	0	48.7
1188373	0	1	2.5	6.02	2.18	2	1	0.12	112	81	9.13	1	0	1	0	1	0	0	0	10.7	0	10.7	0	10.7	0	12
1188905	0	1	2.1	5.68	2.37	3	1	0.68	120	92	10.13	0	0	1	0	0	1	1	0	49.2	0	49.2	0	49.2	0	49.2
1189683	0	1	3.5	4.37	2.68	2	1	0.29	113	69	8.37	0	0	0	0	0	0	1	1	3.2	1	3.2	1	3.2	0	48.1
1189781	0	1	3.4	6.61	4.56	2	1	0.11	121	89	9.97	0	0	1	1	0	1	1	0	37.7	0	37.7	0	37.7	0	37.7
1191154	1	0	4.3	11.49	2.49	1	1	0.75	146	103	11.73	0	0	0	1	0	1	1	1	10.5	1	28.3	1	28.3	0	46.3
1194156	0	0	3.1	8.89	4.25	2	1	0.3	123	84	9.7	0	0	0	0	0	0	0	1	12.8	1	12.8	1	12.8	0	33.8
1194656	1	1	2.5	5.2	2.74	3	1	0.71	124	82	9.6	0	0	0	0	0	1	1	0	34.4	0	34.4	0	34.4	0	34.4
1195295	0	1	2.4	5.2	2.66	1	1	0.32	100	49	6.6	0	0	1	0	0	1	0	1	19.2	1	1.9	1	19.2	0	22.2
1196985	0	1	2.6	5.73	3.03	3	1	1.67	139	89	10.57	1	0	1	0	0	1	1	1	17	1	17	1	17	0	39.3
1197970	1	0	3.2	5.89	3.06	1	1	0.08	127	83	9.77	0	0	1	0	0	1	1	1	10.8	1	10.8	1	10.8	0	46.7
1198782	1	1	2.3	7.63	2.6	2	1	0.74	116	86	9.6	1	0	1	1	2	0	1	1	8.9	1	13	1	13	0	25
1200125	1	1	3.3	6.27	3.55	2	1	0.25	115	76	8.9	0	0	1	0	0	1	1	0	42.2	0	42.2	0	42.2	0	42.2
1203962	1	1	1.5	4.78	2.18	2	1	0.81	119	67	8.43	1	0	1	0	0	0	0	1	5.8	0	42.6	0	42.6	0	42.6
1206565	0	1	1.7	4.3		1	1	0.5	124	67	8.6	0	0	1	0	0	1	0	1	6.7	1	17.5	1	17.5	0	33.2
1207455	1	1	2.4	7.19		2	1	1.65	144	97	11.27	1	0	1	0	0	0	1	1	24.7	1	24.7	1	24.7	0	44
1208292	0	1	2.7	7.57		2	1	0.3	136	86	10.27	0	0	1	1	1	1	1	0	44.8	0	44.8	0	44.8	0	44.8
1209571	1	0	2.5	13.94	3.01	1	1	2.59	115	74	8.77	1	0	1	1	0	1	0	0	27.4	0	27.4	0	27.4	1	27.4
1209601	1	0	4.5	9.66		0.5	0	0.5	129	82	9.77	0	0	1	0	0	0	0	1	18.9	1	6.9	1	18.9	0	44.6
1210463	0	1	2.4	5.98	3.57	2	1	1.69	107	76	8.63	1	0	1	0	0	1	1	0	43.8	0	43.8	0	43.8	0	43.8
1212080	1	1	4.3	8.36	3.96	2	1	1.5	142	83	10.27	0	0	1	0	1	1	0	1	5.9	1	2	1	5.9	0	43.4
1216191	1	1	4.1	8.63	4.35	3	1	1.5	105	78	8.7	1	0	1	0	0	1	1	0	43.9	1	32.8	0	43.9	0	43.9
1216199	1	0	2.6	7.86	2.11	3	1	0.36	140	90	10.67	1	0	1	0	0	1	1	1	3.7	1	3.7	1	3.7	0	12
1217110	1	0	5.2	8.27		2	1	0.03	106	71	8.27	1	0	1	0	0	0	1	1	5.3	1	0	1	5.3	0	35.7
1217914	1	1	2.5	5.29	2.52	2	1	0.22	118	71	8.67	0	0	1	0	0	1	0	1	4	1	8.3	1	8.3	0	36.9
1220191	0	1	2.5	15.65	3.08	2	1	1.1	136	105	11.53	1	0	1	1	0	1	1	0	32.6	0	32.6	0	32.6	0	32.6
1221492	1	1	2.7	4.9	2.69	0.5	0	0.11	131	83	9.9	0	0	1	0	0	0	0	1	15.9	1	7.8	1	15.9	0	42.6
1221525	0	1	2.7	4.26	2.55	3	1	0.5	99	62	7.43	0	0	1	0	0	0	1	0	33.6	1	6.3	0	33.6	0	33.6
1221605	1	1	1.9	4.16		3	1	0.67	130	92	10.47	1	0	1	0	0	0	1	1	15.7	1	10.9	1	15.7	0	40.7
1221663	1	1	3.4	5.68		2	1	0.5	117	85	9.57	1	0	1	0	0	1	1	1	27.8	1	20.5	1	27.8	0	42.4
1223791	0	1	3.3	10.73	1.62	2	1	2.31	130	89	10.27	1	0	1	1	0	0	1	1	23.8	0	38.4	0	38.4	0	38.4
1224301	1	1	2.8	4.85	1.84	3	1	0.49	116	79	9.13	1	0	1	0	0	1	1	0	41.9	1	19.6	0	41.9	0	41.9
1224304	0	0	3.3	6.85	3.52	3	1	0.5	128	84	9.87	0	0	1	0	0	1	1	1	20.9	1	11.3	1	20.9	0	43
1225950	0	1	3.2	4.81	1.77	1	1	0.42	113	74	8.7	1	0	1	0	0	0	0	0	23.5	1	4.2	0	23.5	0	23.5
1227154	1	0	2.6	11.38	2.92	2	1	0.18	102	72	8.2	0	0	1	1	0	0	1	0	41.2	0	41.2	0	41.2	0	41.2
1227155	1	0	1.6	10.2	2.1	2	1	0.75	123	67	8.57	1	0	1	0	1	1	1	0	42.5	0	42.5	0	42.5	0	42.5
1227164	1	0	3.4	11.86	1.18	3	1	0.36	133	72	9.23	0	0	1	0	0	1	1	1	12.3	1	12.3	1	12.3	0	43
1228489	0	0	1.5	6.93	1.93	3	1	0.36	132	91	10.47	1	0	0	0	0	1	1	1	13.6	0	38.9	0	38.9	0	38.9
1231593	1	1	3.2	6.1		2	1	1.18	128	89	10.2	1	0	1	0	1	0	1	1	11.1	1	11.1	1	11.1	0	24.8
1231630	0	1	2.2	8.13	3	3	1	0.61	104	73	8.33	1	0	0	0	0	1	1	0	29.7	0	29.7	0	29.7	0	29.7
1233138	1	1	2.5	6.32	1.75	1	1	1.15	133	69	9.03	0	0	1	0	0	1	1	1	11.4	0	39.1	0	39.1	0	39.1
1234630	1	1	4.7	10.99	2.28	2	1	1.57	158	87	11.07	1	1	1	0	1	0	1	0	21.9	0	21.9	0	21.9	0	21.9
1237125	0	1	2.5	5.44	2.72	3	1	0.42	83	56	6.5	0	0	1	0	0	0	1	0	26.7	0	26.7	0	26.7	0	26.7
1237336	0	1	1.5	4.14	2.46	3	1	0.14	104	77	8.6	1	0	0	0	1	1	0	1	8.9	1	0	1	8.9	0	25.2
1241647	0	1	2.9	10.09	1.92	0.5	0	1.06	139	94	10.9	1	0	1	0	0	1	1	1	0.8	0	21.3	0	21.3	0	21.3
1244148	0	0	2.5	9.09	3.84	3	1	0.44	104	64	7.73	0	0	1	0	1	0	1	0	35.8	1	0.4	0	35.8	0	35.8
1244761	1	1	4.3	6.21		2	1	0.25	114	77	8.93	0	0	1	0	1	0	1	1	18.5	1	8	1	18.5	0	37.9
1245377	1	0	2.7	8.7	2.44	2	1	0.38	129	70	8.97	1	0	0	0	1	0	0	1	26.6	1	24.3	1	26.6	0	38.8
1245698	1	0	3.2	10.75	2.07	1	1	0.25	121	84	9.63	1	0	1	1	1	1	1	1	4.6	1	3.4	1	4.6	0	40.3
1246986	1	0	5.3	14.17		2	1	1.53	131	76	9.43	1	0	1	1	1	0	0	0	40.5	0	40.5	0	40.5	0	40.5
1247908	0	1	3	7.58	3.57	2	1	0.29	131	101	11.1	0	0	1	1	0	0	0	0	37.8	0	37.8	0	37.8	0	37.8
1249551	0	1	2.8	4.27	2.22	3	1	0.29	132	79	9.67	1	0	1	0	1	1	1	1	9.4	1	5.9	1	9.4	0	38.7
1250664	1	1	3.3	6.09	2.76	3	1	1.24	130	84	9.93	1	0	1	0	0	1	1	1	9.7	1	9.7	1	9.7	0	35.2
1252609	0	1	2.8	6.63	5.83	2	1	1.3	114	73	8.67	1	0	1	0	0	1	1	0	40.2	0	40.2	0	40.2	0	40.2
1253411	1	1	2.6	6.5	2.06	3	1	1.27	142	104	11.67	1	0	1	0	0	0	1	0	40.3	0	40.3	0	40.3	0	40.3
1262430	1	0	3.5	12.7	2.91	2	1	1.48	125	77	9.3	1	0	1	1	0	0	1	0	37.3	0	37.3	0	37.3	0	37.3
1262620	1	0	4.8	15.16		2	1	1.07	147	95	11.23	1	0	1	1	1	1	1	1	6.5	1	6.5	0	38.5	0	38.5
1265793	1	0	2.8	7.55	2.56	2	1	0.32	155	95	11.5	1	0	1	0	0	1	1	1	19.1	1	19.1	1	19.1	0	36
1267859	0	1	3.6	7.52	3.49	2	1	0.57	120	73	8.87	1	0	1	0	0	0	0	0	30.9	0	30.9	0	30.9	0	30.9
1268130	0	1	3.6	5.92	2.28	1	1	0.53	134	96	10.87	1	0	1	1	0	0	1	0	36.6	0	36.6	0	36.6	0	36.6
1269658	1	1	3.2	6.14	2.82	3	1	1.45	129	94	10.57	0	0	1	0	0	0	1	1	28.3	0	35.2	0	35.2	0	35.2
1269664	1	1	2	7.39		1	1	1.52	135	66	8.9	1	0	1	0	1	1	0	1	22.1	1	22.1	1	22.1	0	35.4
1281984	1	0	2.8	13.91	2.77	1	1	0.92	103	85	9.1	1	0	1	1	1	1	1	1	5.9	1	15.2	1	21.3	0	36.1
1285326	1	1	3.1	6.08	3.75	3	1	0.77	122	79	9.33	1	0	1	0	1	1	1	1	12.5	1	12.5	1	12.5	0	34.2
1286010	1	1	2.7	5.07	2.01	1	1	0.06	108	79	8.87	1	0	0	0	0	0	0	0	10	1	3.3	0	10	0	12
1288581	1	0	3.4	8.02		3	1	0.5	137	81	9.97	0	0	1	0	1	1	0	1	5	1	7.3	1	7.3	0	32.6
1288587	0	1	2.7	8.88	3.41	3	1	0.42	128	77	9.4	0	0	1	1	0	1	1	0	28.1	1	3.1	0	28.1	0	28.1
1295273	1	0	3.5	11.25	1.83	2	1	0.21	130	90	10.33	1	0	0	0	0	0	0	0	33.2	0	33.2	0	33.2	0	33.2
1295298	1	1	2.6	4.72	2.04	2	1	1.75	139	77	9.77	0	0	1	0	0	0	0	0	31.9	1	17.6	0	31.9	0	31.9
1305770	1	1	2.4	5.24	3.91	3	1	0.25	120	76	9.07	1	0	1	0	0	1	1	0	33.5	0	33.5	0	33.5	0	33.5
1306662	1	0	2.5	9.1	1.7	3	1	0.96	133	87	10.23	1	0	1	0	1	0	1	1	16.3	1	7.7	1	20.6	0	32.4
1308156	0	0	1.6	7.75	2.59	3	1	0.33	134	78	9.67	0	0	1	0	0	1	1	0	10.5	0	10.5	0	10.5	0	12
1308922	0	1	2.6	5.07	3.28	1	1	0.59	140	86	10.4	1	0	1	0	0	0	1	0	17.2	0	17.2	0	17.2	0	17.2
1309922	1	0	3.3	8.36	2.79	2	1	0.18	136	87	10.33	1	0	1	0	0	0	0	0	31.2	1	3	0	31.2	0	31.2
1311769	1	0	2.7	8.13	3.71	0.5	0	0.5	126	86	9.93	0	0	0	0	0	0	1	1	3	1	3	1	3	0	23.3
1318216	0	1	2.3	5.88	1.83	2	1	0.03	127	84	9.83	0	0	0	0	0	0	0	0	15.9	1	3.3	0	15.9	0	15.9
1319363	0	0	1.8	6.84	2.26	3	1	1.06	110	78	8.87	1	0	1	0	0	1	1	1	3.4	1	6.4	1	6.4	0	27.4
1320706	1	0	3.8	12.54	3.91	3	1	1.1	137	114	12.17	0	0	1	0	0	1	1	0	23.6	1	2.6	0	23.6	0	23.6
1321924	0	1	2.8	5.16	1.5	3	1	0.13	123	81	9.5	0	0	1	0	1	1	1	1	13.3	1	12.2	1	13.3	0	26.9
1326354	0	1	2.6	6.07	3.79	3	1	0.46	113	77	8.9	1	0	1	0	0	0	1	0	28.4	0	28.4	0	28.4	0	28.4
1326358	0	0	2.8	7.82	3.77	1	1	0.22	142	88	10.6	1	0	1	0	0	0	1	0	24.3	0	24.3	0	24.3	0	24.3
1328404	1	1	3.9	6.85	2.72	2	1	0.5	102	79	8.67	0	0	0	0	0	1	1	1	9.9	1	0.7	1	9.9	0	30
1330021	1	0	3	8.68		2	1	0.77	127	80	9.57	1	0	1	0	1	1	1	1	15.8	1	15.8	1	15.8	0	28.7
1331226	1	1	2.4	5.55		1	1	0.62	118	73	8.8	0	0	1	0	0	0	1	1	23	1	3.4	1	23	0	25.5
1332154	0	0	1.9	8.17	2.93	1	1	1.12	136	74	9.47	1	0	1	0	0	0	1	1	10.3	0	21.1	0	21.1	0	21.1
1332278	0	0	2	6.84	3.54	2	1	0.27	129	80	9.63	0	0	0	0	0	0	0	1	8.7	1	3.6	1	8.7	0	29.2
1332529	0	1	1.7	8.92	2.6	3	1	0.11	137	101	11.3	1	0	0	0	0	0	1	0	27.3	1	16.9	0	27.3	0	27.3
1336153	1	1	3.6	5.62	2.71	1	1	0.5	116	57	7.67	0	0	0	0	0	0	1	1	4.5	1	1.7	1	4.5	0	25.2
1336180	0	0	2.7	8.33	3.54	0.5	0	2.2	149	125	13.3	0	0	0	1	0	1	1	1	22.1	0	29.4	0	29.4	0	29.4
1339079	1	1	3.6	6.01		3	1	0.44	98	71	8	1	0	1	0	1	0	0	0	28.8	0	28.8	0	28.8	0	28.8
1339232	0	1	1.6	6.33	4.29	3	1	0.76	114	66	8.2	1	0	0	0	1	1	1	0	15.2	0	15.2	0	15.2	0	15.2
1341975	1	1	3.2	6.52		3	1	1	124	67	8.6	1	0	1	0	1	0	1	1	10.3	1	8.8	1	10.3	0	26.5
1344360	0	1	2.8	6.29	2.72	2	1	0.32	129	88	10.17	1	0	1	0	1	1	1	1	6.8	0	28.1	0	28.1	0	28.1
1347283	0	1	2.7	7.07	3.11	1	1	1.41	135	98	11.03	1	0	1	1	0	1	1	0	24.2	0	24.2	0	24.2	0	24.2
1347669	1	0	3	13.63	1.89	0.5	0	3.2	135	99	11.1	1	0	1	1	0	1	1	1	1.8	0	26.8	0	26.8	0	26.8
1347963	1	1	3.8	7.1		3	1	0.19	114	79	9.07	1	0	1	0	0	0	1	0	26.9	1	8.5	0	26.9	0	26.9
1356463	0	0	2.2	7.39	1.84	2	1	0.56	113	82	9.23	1	0	1	0	0	1	1	0	27.2	0	27.2	0	27.2	0	27.2
1357875	1	0	4.3	14.17	3.05	2	1	0.59	96	69	7.8	1	0	1	2	0	1	1	0	25.5	0	25.5	0	25.5	0	25.5
1360918	1	1	2.9	5.9	2.06	3	1	0.21	139	89	10.57	0	0	1	0	0	1	1	0	24.1	1	8.3	0	24.1	0	24.1
1360931	1	1	2.5	5.96	3.78	2	1	3.5	126	90	10.2	0	0	1	1	0	1	1	0	25.4	0	25.4	0	25.4	0	25.4
1360933	1	1	2.8	5.25		3	1	1.09	115	78	9.03	0	0	1	1	1	0	0	0	21.8	0	21.8	0	21.8	0	21.8
1361034	1	1	2.9	11.96	2.58	2	1	1.9	114	76	8.87	1	0	1	1	0	1	0	0	22.3	0	22.3	0	22.3	0	22.3
1366081	1	1	2.7	10.99		2	1	2.27	140	89	10.6	1	0	1	2	1	1	1	0	23.8	0	23.8	0	23.8	0	23.8
1370462	1	1	3	6.73	1.88	3	1	1.08	116	79	9.13	0	0	1	2	1	1	1	0	12.2	0	12.2	0	12.2	0	12.2
1370590	1	1	3	5.83	1.25	2	1	0.06	163	53	8.97	0	0	1	0	0	0	0	1	2.3	1	2.3	1	2.3	0	23.1
1372613	0	1	3.1	5.78	1.94	2	1	0.58	121	85	9.7	0	0	1	0	0	0	0	0	18.4	0	18.4	0	18.4	0	18.4
1373397	1	0	2.3	16.21	4.85	2	1	2.53	147	81	10.3	0	0	0	1	1	1	1	0	23	0	23	0	23	0	23
1388513	1	1	2.6	4.69	3.2	3	1	0.08	122	77	9.2	0	0	0	0	0	0	0	1	8.7	1	0	1	8.7	0	22.1
1389727	0	1	2.8	6.13	3.28	0.5	0	0.63	144	105	11.8	0	0	1	0	0	0	1	1	5.2	0	11.8	0	11.8	0	12
1399794	0	1	3	3.96		2	1	0.21	131	91	10.43	1	1	0	0	1	1	1	0	16.5	0	16.5	0	16.5	0	16.5
1400593	1	1	2.8	4.19	2.03	2	1	0.22	121	77	9.17	1	0	1	0	0	1	1	0	20.3	0	20.3	0	20.3	0	20.3
1402398	1	0	3.5	11.36	2.44	3	1	1.29	115	92	9.97	1	1	1	0	1	1	1	0	20.9	1	6.8	0	20.9	0	20.9
1402918	0	0	2.7	11.49	1.42	2	1	3.5	150	91	11.07	1	0	1	1	0	1	1	0	21.1	0	21.1	0	21.1	0	21.1
1403715	1	0	3	7.27	3.11	1	1	0.63	123	76	9.17	1	0	1	0	0	0	1	0	11.5	1	3.6	0	11.5	0	12
1403984	1	1	4.2	7.75		2	1	0.2	139	78	9.83	1	0	1	0	1	0	0	0	20.7	0	20.7	0	20.7	0	20.7
1408135	1	0	2.9	7.81	2.89	1	1	0.5	123	74	9.03	1	0	1	0	1	1	0	1	4.6	1	1.9	1	4.6	0	19.7
1414651	1	1	4.5	6.13	2.82	2	1	1.6	133	94	10.7	1	0	0	0	0	1	1	0	13.8	0	13.8	0	13.8	0	13.8
1417293	1	1	3.4	5.01	3	1	1	0.13	117	75	8.9	0	0	0	0	0	1	0	0	18.4	0	18.4	0	18.4	0	18.4
1419612	1	1	2.6	7.4		3	1	3.5	137	64	8.83	1	0	1	1	1	1	1	0	19.1	0	19.1	0	19.1	0	19.1
1419644	0	0	2.8	8.52	2.26	2	1	0.18	103	61	7.5	0	0	1	0	0	1	1	1	9.8	1	2.8	1	9.8	0	19
1424298	1	1	1.8	7.34		3	1	2.8	118	72	8.73	1	0	1	0	1	1	1	1	7.5	1	7.5	1	7.5	0	17.1
1426679	1	1	3.4	14.27	3.8	2	1	2.55	119	88	9.83	1	0	1	2	1	0	0	0	17.6	0	17.6	0	17.6	0	17.6
1428944	1	1	3	7.56	2	0.5	0	0.97	128	94	10.53	0	0	1	0	0	1	1	1	7.3	0	13.2	0	13.2	0	13.2
1429532	1	1	3.4	5.62	2.59	0.5	0	0.14	112	73	8.6	0	0	1	0	0	1	1	1	12.9	1	0	1	12.9	0	14.7
1432995	1	1	1.6	5.02		1	1	0.6	114	70	8.47	0	0	0	0	0	1	0	1	6	1	6	1	6	0	16.1
1434454	1	1	4.1	5.11	4.67	2	1	0.26	97	63	7.43	0	0	0	0	0	1	0	0	17.7	1	5	0	17.7	0	17.7
1438079	1	1	2.5	13.93	2.66	2	1	1.23	117	85	9.57	0	0	1	2	0	1	0	0	15.3	0	15.3	0	15.3	0	15.3
1440101	1	0	2.1	7.7	2.1	3	1	0.5	136	95	10.87	0	0	1	0	0	1	1	1	7.3	0	15.4	0	15.4	0	15.4
1440309	1	1	2.5	6.54		2	1	0.5	137	85	10.23	0	0	0	0	0	0	1	0	17.4	1	4.6	0	17.4	0	17.4
1441123	1	0	1.7	6.63		2	1	1.09	135	90	10.5	1	0	1	0	1	0	1	0	15	0	15	0	15	0	15
1441434	1	0	1.6	6.54		2	1	0.5	130	70	9	0	0	0	0	0	0	0	0	10.3	0	10.3	0	10.3	0	12
1441638	1	1	1.6	5.74		2	1	0.37	132	77	9.53	0	0	1	0	1	0	1	1	4.2	1	4.2	1	4.2	0	12.6
1443094	1	1	3.7	7.72	1.59	2	1	3.5	119	74	8.9	1	0	1	0	0	0	1	0	14.2	0	14.2	0	14.2	0	14.2
1448182	1	0	2.7	8.57	3.63	3	1	0.5	129	78	9.5	0	0	1	0	0	1	1	0	12.5	0	12.5	0	12.5	0	12.5
1460662	0	1	3.6	5.97	2.29	3	1	0.3	113	85	9.43	1	0	1	1	0	1	0	0	14	0	14	0	14	0	14
1464900	1	1	4	5.52	4.27	2	1	0.28	111	72	8.5	1	0	1	0	1	1	0	0	13.9	0	13.9	0	13.9	0	13.9
1468222	0	0	1.9	7.6	3.68	1	1	0.45	146	81	10.27	1	0	1	0	1	0	1	1	3.2	0	11.8	0	11.8	0	12
1470770	1	1	2.8	4.74	3.41	2	1	0.24	136	89	10.47	1	0	1	0	1	0	0	1	7.7	1	3	1	7.7	0	13.1
1471585	1	0	1.9	7.13	2.34	3	1	1.99	149	81	10.37	1	0	1	0	0	1	1	0	11.9	0	11.9	0	11.9	0	12
1471615	1	1	2.8	6.07	3.72	3	1	0.91	144	88	10.67	0	0	1	0	1	1	1	0	12.4	0	12.4	0	12.4	0	12.4
1474723	0	1	2.3	5.53	1.89	2	1	1.03	109	74	8.57	0	0	1	0	0	0	0	0	9.4	0	9.4	0	9.4	0	12
1474777	1	0	2.8	7.63	4.41	3	1	2.5	92	56	6.8	0	0	1	0	0	0	0	0	12.9	0	12.9	0	12.9	0	12.9
1475517	1	0	3.2	10.46	1.81	2	1	1.09	130	90	10.33	1	0	1	0	0	1	1	0	11.6	0	11.6	0	11.6	0	12
1475534	1	0	3	7.75	2.53	2	1	0.76	132	85	10.07	1	0	1	1	0	1	1	0	12.1	0	12.1	0	12.1	0	12.1
