# Supplementary material for: Efficacy and indications of tonsillectomy in patients with IgA nephropathy: a retrospective study
Source: PeerJ journal article supplement (doi:10.7717/peerj.14481), 2022-12-05

M0

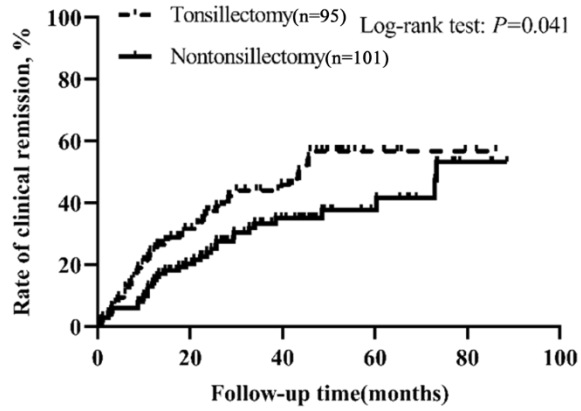

M1

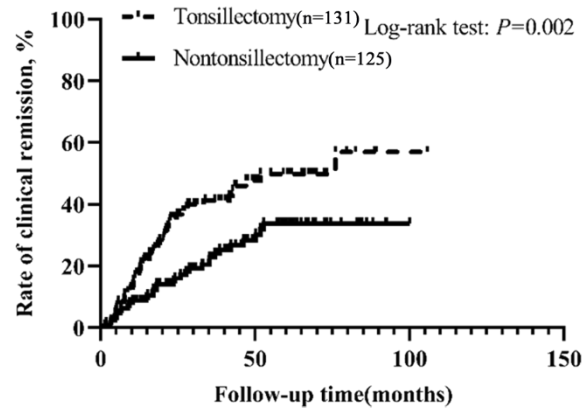

E0

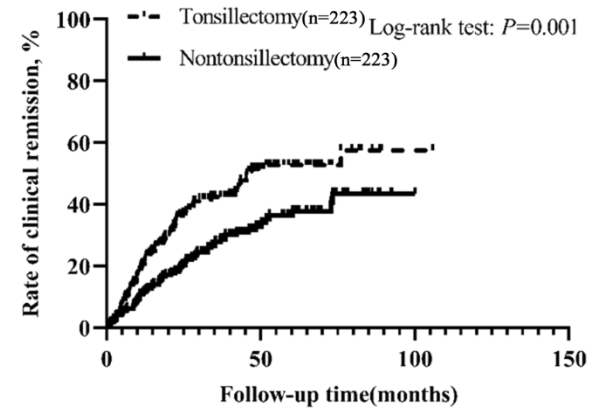

S0

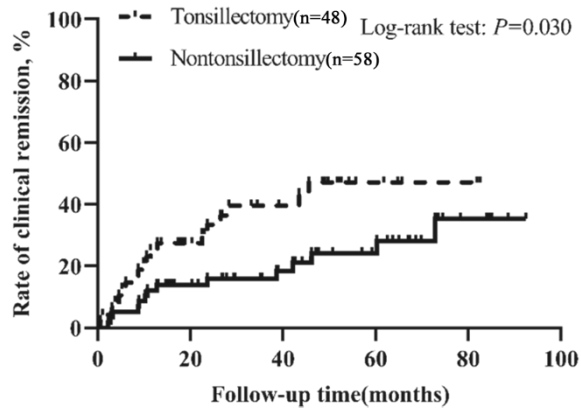

S1

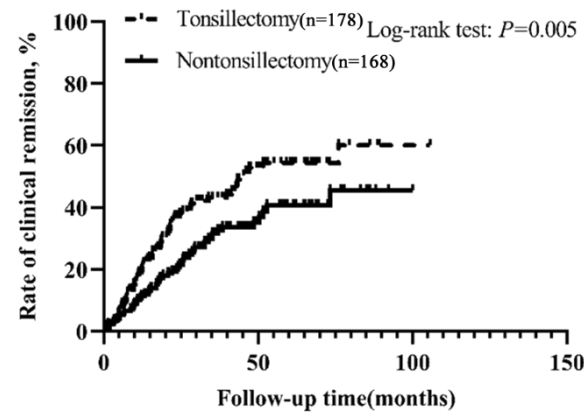

T0

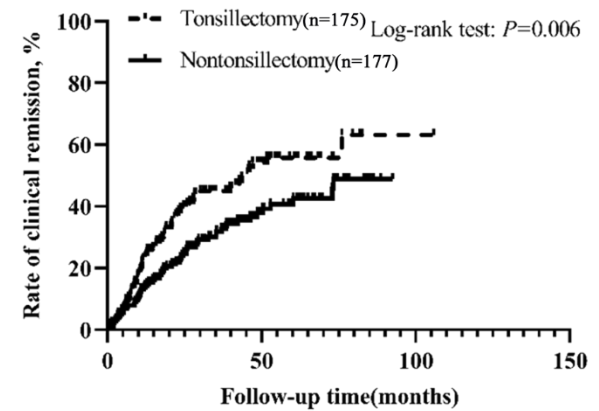

T1

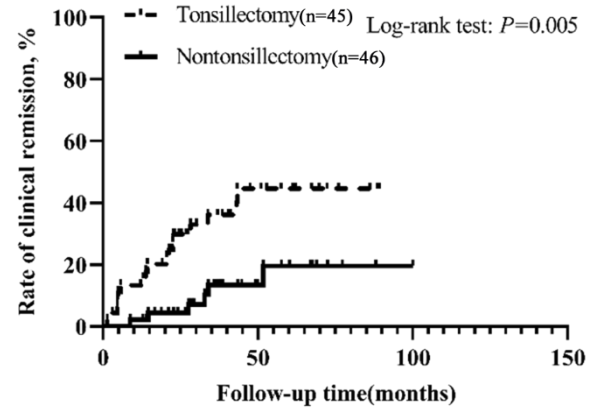

C0

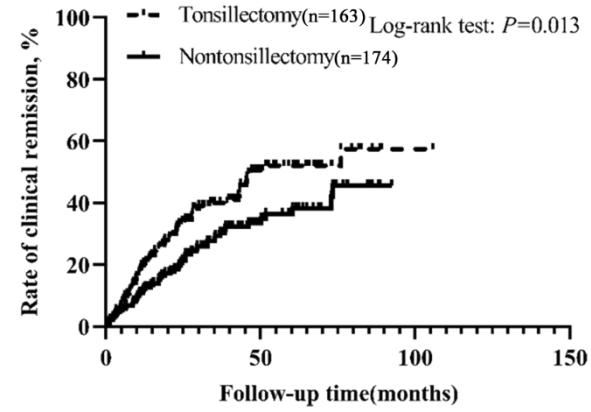

C1

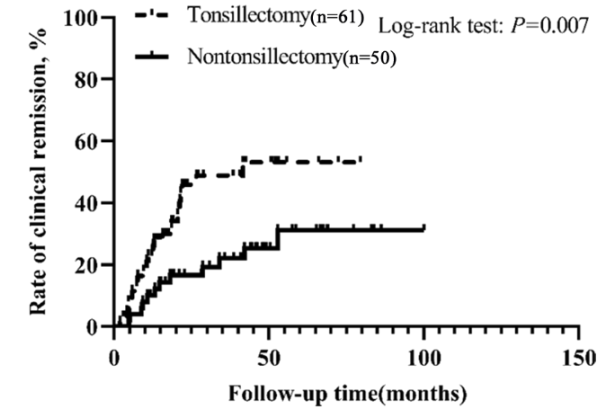

Supplement: Supplemental_figures_S1.pdf [file Supplemental_figures_S1.pdf]
