# Supplementary material for: Efficacy and indications of tonsillectomy in patients with IgA nephropathy: a retrospective study
Source: PeerJ journal article supplement (doi:10.7717/peerj.14481), 2022-12-05
Supplement: Supplemental_Table_S1.pdf [file Supplemental_Table_S1.pdf]

**Table S1:**

Comparison of hematuria and proteinuria between the tonsillectomy and nontonsillectomy groups before and after treatment.

|                  | Hematuria      |                  |                 | Proteinuria     |                  |                 |
|------------------|----------------|------------------|-----------------|-----------------|------------------|-----------------|
|                  | Tonsillectomy  | Nontonsillectomy | <i>P</i> -value | Tonsillectomy   | Nontonsillectomy | <i>P</i> -value |
| Before treatment | 5/17/35/100/69 | 4/25/39/97/61    | 0.665           | 19/19/114/55/19 | 22/32/111/51/10  | 0.164           |
| After treatment  | 58/22/49/66/31 | 41/14/51/68/52   | 0.039*          | 129/31/35/22/9  | 106/25/52/37/6   | 0.031*          |

Values are expressed as the counts of hematuria score or proteinuria score, 0/0.5/1/2/3.

\*Statistically significant
