# Supplementary material for: Efficacy and indications of tonsillectomy in patients with IgA nephropathy: a retrospective study
Source: PeerJ journal article supplement (doi:10.7717/peerj.14481), 2022-12-05
Supplement: Supplemental_Table_S2.pdf [file Supplemental_Table_S2.pdf]

**Table S2:**

Comparison of background therapy between the tonsillectomy and nontonsillectomy groups under different proteinuria grades.

| Background therapy | Steroid/ Immunosuppressant |                  |                 | RAS inhibitor |                  |                 |
|--------------------|----------------------------|------------------|-----------------|---------------|------------------|-----------------|
|                    | Tonsillectomy              | Nontonsillectomy | <i>P</i> -value | Tonsillectomy | Nontonsillectomy | <i>P</i> -value |
| ≤1g/24h            | 84/154                     | 88/166           | 0.783           | 108/154       | 113/166          | 0.691           |
| >1g/24h            | 45/72                      | 35/60            | 0.626           | 54/72         | 41/60            | 0.396           |
