# Supplementary material for: Efficacy and indications of tonsillectomy in patients with IgA nephropathy: a retrospective study
Source: PeerJ journal article supplement (doi:10.7717/peerj.14481), 2022-12-05
Supplement: Supplemental_Table_S3.pdf [file Supplemental_Table_S3.pdf]

**Table S3:**

Comparison of background therapy between the tonsillectomy and nontonsillectomy groups under different MEST-C scores.

| Background therapy | Steroid/ Immunosuppressant |                  |                 | RAS inhibitor |                  |                 |
|--------------------|----------------------------|------------------|-----------------|---------------|------------------|-----------------|
|                    | Tonsillectomy              | Nontonsillectomy | <i>P</i> -value | Tonsillectomy | Nontonsillectomy | <i>P</i> -value |
| M0                 | 46/95                      | 53/101           | 0.570           | 63/95         | 64/101           | 0.666           |
| M1                 | 83/131                     | 70/125           | 0.230           | 99/131        | 90/125           | 0.516           |
| E0                 | 127/223                    | 120/223          | 0.505           | 160/223       | 152/223          | 0.409           |
| E1                 | 2/3                        | 3/3              | 0.273           | 2/3           | 2/3              | 1.000           |
| S0                 | 22/48                      | 29/58            | 0.669           | 27/48         | 33/58            | 0.947           |
| S1                 | 107/178                    | 94/168           | 0.433           | 135/178       | 121/168          | 0.418           |
| T0                 | 95/175                     | 92/177           | 0.664           | 121/175       | 110/177          | 0.167           |
| T1                 | 30/45                      | 29/46            | 0.717           | 38/45         | 41/46            | 0.509           |
| T2                 | 4/6                        | 2/3              | 1.000           | 3/6           | 3/3              | 0.134           |
| C0                 | 93/163                     | 89/174           | 0.277           | 117/163       | 111/174          | 0.117           |
| C1                 | 35/61                      | 34/50            | 0.251           | 43/61         | 41/50            | 0.160           |
| C2                 | 1/2                        | 0/2              | 0.248           | 2/2           | 2/2              | 1.000           |
